19 **Abstract**

20 In many regions around the world, large populations of native wildlife have declined or been  
21 replaced by livestock grazing areas and farmlands, with consequences on terrestrial-aquatic  
22 ecosystems connectivity and trophic resources supporting food webs in aquatic ecosystems.  
23 The river continuum concept (RCC) and the riverine productivity model (RPM) predict a shift  
24 of carbon supplying aquatic food webs along the river: from terrestrial inputs in low-order  
25 streams to autochthonous production in mid-sized rivers. Here, we studied the influence of  
26 replacing large wildlife (mainly hippos) with livestock on the relative importance of C3  
27 vegetation, C4 grasses and periphyton on macroinvertebrates in the Mara River, which is an  
28 African montane-savanna river known to receive large subsidy fluxes of terrestrial carbon  
29 and nutrients mediated by LMH, both wildlife and livestock. Using stable carbon ( $\delta^{13}\text{C}$ ) and  
30 nitrogen ( $\delta^{15}\text{N}$ ) isotopes, we identified spatial patterns of the relative importance of  
31 allochthonous carbon from C3 and C4 plants (woody vegetation and grasses, respectively)  
32 and autochthonous carbon from periphyton for macroinvertebrates at various sites of the  
33 Mara River and its tributaries. Potential organic carbon sources and invertebrates were  
34 sampled at 80 sites spanning stream orders 1 to 7, various catchment land uses (forest,  
35 agriculture and grasslands) and different loading rates of organic matter and nutrients by  
36 LMH (livestock and wildlife, i.e., hippopotamus). The importance of different sources of  
37 carbon along the river did not follow predictions of RCC and RPM. First, the importance of C3  
38 and C4 carbon was not related to river order or location along the fluvial continuum but to  
39 the loading of organic matter (dung) by both wildlife and livestock. Notably, C4 carbon was  
40 important for macroinvertebrates even in large river sections inhabited by hippos. Second,  
41 even in small 1<sup>st</sup>-3<sup>rd</sup> order forested streams, autochthonous carbon was a major source of

42 energy for macroinvertebrates, and this was fostered by livestock inputs fuelling aquatic  
43 primary production throughout the river network. Importantly, our results show that  
44 replacing wildlife (hippos) with livestock shifts river systems towards greater reliance on  
45 autochthonous carbon through an algae-grazer pathway as opposed to reliance on  
46 allochthonous inputs of C4 carbon through a detrital pathway.

47 **Keywords:** aquatic-terrestrial connectivity, C4 carbon, organic matter, nutrient loading,  
48 MixSIAR models, resource subsidies

49

50

## 51 **1. Introduction**

52 While resource transfers from terrestrial to riverine aquatic ecosystems can occur passively  
53 through wind and atmospheric deposition, overland and riverine flow (Abrantes and  
54 Sheaves, 2010; Lamberti et al., 2010; Wipfli et al., 2007), animals are major active resource  
55 vectors through defecation (egestion), urination (excretion) and in the form of carcasses  
56 (Naiman and Rogers, 1997; Subalusky et al., 2015; Subalusky et al., 2017). Resource subsidies  
57 by large mammalian herbivores (LMH) are particularly interesting because of their capacity  
58 to transfer large amounts of high-quality, nutrient-rich resources that strongly influence  
59 abiotic conditions, productivity, community structure and trophic interactions in recipient  
60 aquatic ecosystems (Vanni, 2002; Masese et al., 2018; Stears et al., 2018).

61 Along their longitudinal gradient, rivers are postulated to exhibit a prominent shift in trophic  
62 resources supporting aquatic communities, influencing their structure and functional  
63 organization besides physical and chemical factors (Vannote et al., 1980; Atkinson et al.,  
64 2017). In temperate headwater streams, allochthonous carbon from C3-plants (woody  
65 vegetation) dominates the base of food webs. As streams widen, however, in-stream  
66 primary production grows, while allochthonous inputs decrease to subsidies leaking from  
67 upstream (Vannote et al., 1980; Thorp and Delong, 1994). In contrast, in Afrotropical  
68 savanna rivers, mega-herbivores including hippos (*Hippopotamus amphibius*), elephants,  
69 buffalo, other ungulates, such as wildebeest, transfer substantial amounts of terrigenous  
70 carbon and nutrients to entire river networks (Naiman and Rogers, 1997; Mosepele et al.,  
71 2009, Hulot et al., 2019), challenging existing models of riverine ecosystem functioning.  
72 Notably, this allochthonous carbon is mainly derived from C4 plants in surrounding  
73 grasslands and seems to critically need grazing LMH as subsidy vectors (Marwick et al.,

74 2014). Indeed, hippo egestion can account for up to 88% of total carbon inputs into lowland  
75 rivers (Subalusky et al., 2015), which may play a similar role as leaf litter in headwater  
76 streams in stimulating microbial processes and supporting food webs (Webster, Benfield et  
77 al. 1999). Large quantities of hippo dung have also been found to be detrimental to aquatic  
78 biodiversity, with fish kills occurring during phases of reduced flow and high hippo density  
79 (Dutton et al., 2018a; Stears et al., 2018).

80 Populations of native LMH have declined in their natural range and have been replaced by  
81 human settlements, farmlands and livestock (Doughty et al., 2013; Ogotu et al., 2016;  
82 Veldhuis et al., 2019). Large herds of livestock (mainly cattle, goats and sheep) may  
83 compensate losses of resource subsidies to aquatic ecosystems arising from wildlife declines  
84 (Iteba et al., 2021; Masese et al., 2020), but the quality, quantity (rate), timing and location  
85 of inputs can substantially differ (Subalusky and Post, 2019), with ensuing implications for  
86 aquatic ecosystem functioning. For instance, nutrient-rich cattle dung was found to increase  
87 primary production relative to hippo dung (Masese et al., 2020). And, since high-quality algal  
88 carbon contributes higher proportions of carbon to metazoan biomass relative to woody  
89 vegetation and grasses (Thorp and Delong, 2002; Douglas et al., 2005; Lau et al., 2009),  
90 livestock may shift aquatic food webs to be more reliant on autochthonous sources of  
91 carbon. This may be facilitated by the increased transportability of cattle dung due to  
92 smaller particle sizes and faster leaching and remineralization (Masese et al., 2020), while  
93 hippo faeces contain large particles that settle on the river bottom and decompose slowly  
94 (Dawson et al., 2016; Dutton et al., 2020).

95 The Mara River (Kenya, Tanzania) traverses a landscape gradient, that makes it well suited to  
96 study the influence of land use change and altered LMH populations on the terrestrial-

97 aquatic linkages achieved through resource subsidies. The forest in the upper reaches  
98 contrasts mixed small-scale and large-scale agriculture and human settlements in mid-  
99 reaches (Mati et al., 2008). The region hosts livestock (mainly cattle, goats and sheep) at  
100 varying densities, grazing in an overlapping distribution with wildlife (Lamprey and Reid  
101 2004; Veldhuis et al., 2019). In the lower reaches, protected savanna grasslands in the  
102 Kenyan Maasai Mara National Reserve (MMNR) harbour over a million migratory herbivores  
103 (Ogutu et al., 2016), including >4000 hippos (Kanga et al., 2011). Per-capita input of organic  
104 matter and nutrients into streams and rivers by individual livestock is small compared to  
105 hippos (Sualusky et al., 2015; Masese et al., 2020) due to smaller body sizes and shorter time  
106 of presence in or near water, but livestock can appear in large numbers (Iteba et al., 2021).  
107 Also, resource subsidies of livestock and wildlife differ in quality, with likely impacts on  
108 aquatic ecosystem functioning. A good assessment of subsidies transferred to the Mara  
109 River critically needs comparative data for livestock and wildlife and how their inputs  
110 interact with river size.

111 Here, we investigate carbon sources fuelling aquatic food webs at various sites along the  
112 Mara River, specifically the interaction between river size and subsidy fluxes driven by  
113 livestock and large wildlife (hippos) at various densities. In the greater Mara River network,  
114 we sampled 80 sites in streams differing in catchment land use and LMH abundance. We  
115 used natural abundance stable isotope analysis (SIA) of carbon ( $\delta^{13}\text{C}$ ) and nitrogen ( $\delta^{15}\text{N}$ ) to  
116 distinguish three main sources of carbon (C3 vegetation, C4 grasses and periphyton) for  
117 macroinvertebrates. Contrary to predictions of the river continuum concept (RCC) and the  
118 riverine productivity model (RPM), we hypothesise that LMH have an overriding influence  
119 over stream size in determining sources of carbon for food webs in savanna rivers.

120 Specifically, in lower sections of the river, autochthonous production and C3 carbon should  
121 decrease in importance while C4 carbon subsidies by livestock and large wildlife should  
122 become more prominent in the diets of invertebrates.

## 123 **2. Materials and Methods**

### 124 **2.1 Study area**

125 This study was conducted in the Kenyan part of the Mara River catchment. Two perennial  
126 tributaries, the Nyangores and Amala rivers drain the Mau Forest, which is the most  
127 extensive tropical moist broadleaf forest in East Africa, before joining to form the Mara  
128 mainstem in the lowlands (Fig. 1). In the middle reaches, several seasonal tributaries,  
129 including the Talek, Olare Orok, Ntiakntiak, Molibany and the Sand, drain the semi-arid  
130 livestock grazing lands and wildlife conservancies outside the Maasai Mara National Reserve  
131 (MMNR). Annual rainfall varies from about 2000 mm in the highlands to around 1000 mm in  
132 the lowland savanna (Jackson and McCarter, 1994). January to March is typically a dry  
133 period, while March-July and October-November are wet periods known as long and short  
134 rains, respectively.

135 The Kalenjin ethnic group live on the highlands while the Maasai pastoralists occupy the  
136 middle and lower portions of the basin. The basin hosts substantial numbers of livestock but  
137 densities differ across the catchment as the Kalenjin have diversified to crop farming and  
138 husbandry of small herds of improved breeds of cattle, while the Maasai's large herds of  
139 cattle are the mainstay of their livelihoods (Lamprey and Reid, 2004). Agricultural expansion  
140 is ongoing across the basin (Mati et al., 2008).

141 The middle reaches of the Mara River and its tributaries within the MMNR host >4,000  
142 hippos (Kanga et al., 2011), which graze in savanna grasslands at night and rest in or near the  
143 river during the day, transferring ~36,000 kg of organic matter in the form of dung per day  
144 from the terrestrial to the aquatic domain (Kanga et al., 2011; Subalusky et al., 2015). In the  
145 same region, Maasai pastoralists graze nearly 200,000 cattle and large numbers of goats and  
146 sheep in communal lands adjoining the MMNR and utilize rivers as watering points (Lamprey  
147 and Reid, 2004; Ogutu et al., 2016; Veldhuis et al., 2019). In communal conservancies  
148 outside the MMNR, people graze their livestock in a manner that allows livestock to co-exist  
149 with wildlife (Kanga et al., 2013). This distribution results in a displacement pattern with  
150 hippo areas inside the reserve, mixed hippo and livestock (mainly cattle) areas in the  
151 conservancies and only livestock grazing areas outside the conservancies (Kanga et al.,  
152 2013).

## 153 **2.2 Study design**

154 A total of 80 sites were selected for sampling during the beginning of the dry season in  
155 January 2018. All sites were sampled only once unless specified otherwise. In most cases, we  
156 sampled at confluences, i.e., working in both tributaries and a third downstream mainstem  
157 site after effective mixing of water from the two tributaries. Sites were selected depending  
158 on both catchment-scale (mainly land use) and reach-scale influences by human activities,  
159 cattle and wildlife. Sites were then grouped into 5 broad regions: forested (19), agricultural  
160 (26), low-density livestock (15), high-density livestock (12), and wildlife (i.e., hippo) (10) sites.  
161 Forest sites had C3 vegetation dominating the catchment and riparian areas, and were used  
162 as a reference for the human and LMH influences. Agricultural sites were in farming areas  
163 (crop cultivation), although most farmers in the area also own low numbers (<20 per km<sup>2</sup>) of



164 livestock (mainly cattle). The low-density livestock sites were also in agricultural areas but  
165 had a higher density of livestock (20-50 per km<sup>2</sup>). The high-density livestock sites were  
166 located in conservancies outside the MMNR where the only land use activity is the grazing of  
167 large herds of cattle (> 100 heads per km<sup>2</sup>), goats and sheep; although some wildlife such as  
168 zebra, wildebeest and other herbivores (but rarely hippos) also occur in these areas. Finally,  
169 hippo sites were located on the Mara River mainstem and tributaries in the MMNR  
170 downstream of river sections inhabited by large populations of hippos (Kanga et al., 2011).

## 171 **2.3 Sample collection**

172 At each site, samples of the dominant riparian plants were collected by hand into aluminium  
173 envelopes. Macrophytes were rare and not considered to be an important resource. We  
174 collected triplicate samples of cattle and hippo dung when encountered at a site. Triplicate  
175 periphyton samples were scrubbed from submerged surfaces after gentle washing to remove  
176 invertebrates and debris. At each site macroinvertebrates were collected from riffles, runs,  
177 pools and marginal vegetation using a dip net (500 µm mesh-size) and sorted alive into  
178 Eppendorf vials. Plant, dung, periphyton slurry (in HDPE bottles) and invertebrates were  
179 frozen for transport to the laboratory pending further processing.

### 180 **2.3.1 Physical and chemical variables**

181 To explore relationships between catchment land use and the importance of various sources  
182 of carbon for invertebrates in the Mara River, sub-catchments for all sites were delineated  
183 based on a digital elevation model of Kenya (90 m resolution, Shuttle Radar Topography  
184 Mission) and their land cover analyzed according to the major types; forest (both natural and

185 plantation), agriculture (cropland) and settlements, grasslands (grazing lands) and  
186 shrublands.

187 At each site, we measured average stream width at 20-30 randomly located transects and  
188 average depth and velocity at a minimum of 100 randomly located points. Discharge was  
189 estimated using the velocity-area method at one transect. Dissolved oxygen concentration  
190 (DO), pH, temperature and electrical conductivity were measured *in situ* using a WTW  
191 Multiprobe 3320 (pH320, OxiCal-SL, Cond340i; Weilheim, Germany).

### 192 **2.3 Sample preparation and stable isotope analysis**

193 On return to the laboratory, samples were immediately prepared for isotope analysis or  
194 preserved at -20°C. To clean periphyton, the slurry was decanted onto a petri dish and excess  
195 water evaporated in an oven at 60 °C for 48 h. The dry sample was ground using a mortar and  
196 pestle, an aliquot was weighed into a tin cup. Macroinvertebrate specimens were thawed  
197 and examined under a dissecting microscope to confirm identity and remove stomach  
198 contents before drying at 60 °C for 48 h. These samples were ground with an IKA A 11 Basic  
199 mill (IKA-Werke GmbH & Co. KG, 79219, Staufen, Germany) and weighed into tin cups.

200 Macroinvertebrates were identified mostly to the genus level. Several individuals of a given  
201 taxon from each site were pooled to produce sufficient dry tissue mass except for species  
202 with larger body sizes such as crabs (*Potamonautes* spp.), dragonflies and damselflies  
203 (Odonata), some beetles (Coleoptera) and bugs (Hemiptera). To avoid contamination by  
204 carbonates, which can be enriched in <sup>13</sup>C compared to living tissue, we only used soft tissues  
205 from crabs and Mollusca.

206 Stable isotope analysis was done on a Thermo Finnigan DeltaPlus Advantage isotope ratio  
207 mass spectrometer (IRMS, Thermo Scientific) coupled to an ECS 4010 EA elemental analyzer  
208 (Costech Analytical Technologies). Stable isotope ratios ( $^{13}\text{C}/^{12}\text{C}$  and  $^{15}\text{N}/^{14}\text{N}$ ) are expressed  
209 in parts per mil (‰) deviations to the international standard, as defined by the equation:  
210  $\delta^{13}\text{C}$ ,  $\delta^{15}\text{N} = [(R_{\text{sample}}/R_{\text{reference}}) - 1] \times 10^3$ , where  $R = ^{13}\text{C}/^{12}\text{C}$  for carbon and  $^{15}\text{N}/^{14}\text{N}$  for  
211 nitrogen.  $\delta^{13}\text{C}$  values were normalized to the international scale Vienna Pee Dee Belemnite  
212 (VPDB) and  $\delta^{15}\text{N}$  values to atmospheric nitrogen, by analyzes of the international standards  
213 USGS40 and USGS41 (L-glutamic acid) within the sequence (Qi et al. 2003). In addition, a  
214 laboratory standard ( $\delta^{13}\text{C} = -27.11$  ‰,  $\text{C}\% = 48.12$ ;  $\delta^{15}\text{N} = 0.48$  ‰,  $\text{N}\% = 2.17$ ), which was  
215 calibrated directly against USGS40 and USGS41, was measured at different positions within  
216 the run. Precision, defined as the standard deviation ( $\pm 1\sigma$ ) of the laboratory control standard  
217 along the run was better than  $\pm 0.79$ ‰ for C and  $\pm 0.55$ ‰ for N.

#### 218 **2.4 Functional feeding groups and trophic groups**

219 Macroinvertebrate taxa were assigned to functional feeding groups (FFGs) and trophic  
220 groups based on (Masese et al., 2014) and references therein. FFGs considered included  
221 shredders feeding on coarse particulate organic matter (CPOM), scrapers feeding on  
222 autochthonous production (periphyton), collector-filterers feeding on suspended fine  
223 particulate organic matter (FPOM), collector-gatherers feeding on deposited FPOM and  
224 predators feeding on live animal tissue (Merritt et al., 2017). Shredders, scrapers and  
225 collectors were also subsumed as herbivores.

226

## 227 **2.5 Data analysis**

228 All physical and chemical data were transformed using natural-log transformations before  
229 analysis. We used one-way analysis of variance (ANOVA) to test for differences in water  
230 quality, stream size and land use variables among the five regions, followed by post hoc  
231 Tukey's Honestly Significant Difference (HSD) multiple comparisons of means.

232 We used MixSIAR Bayesian mixing model to estimate the contributions of different basal  
233 sources to consumer diets (Parnell et al., 2010; Stock and Semmens, 2013). Models were run  
234 for each site separately for each FFG and common family. Only C3 and C4 plants and  
235 periphyton were included in the models as possible sources of carbon and nitrogen (Masese  
236 et al.; 2015, 2018). For periphyton, we calculated standard deviations of source values for  
237 input into MixSIAR from triplicate samples collected from the same site. Because the isotopic  
238 values of vegetation are influenced by elevation, for C3 and C4 sources we grouped sites into  
239 three groups defined by elevation: headwaters (> 2800 m a.s.l.), middle reaches (2000-2800  
240 m a.s.l.) and lower reaches in the MMNR and surrounding areas (<2000 m a.s.l.). Trophic  
241 enrichment factors (TEFs) were set to zero after manually correcting for trophic fractionation  
242 in the stable isotope composition of consumers. For  $\delta^{15}\text{N}$ , we used a trophic fractionation of  
243  $0.6 \pm 1.7 \text{ ‰}$  and  $1.8 \pm 1.7 \text{ ‰}$  for herbivorous and predatory macroinvertebrates, respectively  
244 (Bunn et al., 2013). For  $\delta^{13}\text{C}$ , we used a trophic fractionation of  $0.5 \pm 1.3 \text{ ‰}$  (McCutchan Jr et  
245 al., 2003). Concentration dependencies were set to zero.

246 For each site, river distance from the source (RDS) was calculated as the square root of the  
247 drainage area (Rasmussen et al., 2009) as a general measure reflecting the linear dimension  
248 of a watershed. This is based on the finding that the average length of stream paths leading  
249 to a point in the drainage can be expressed as a power function of the drainage area

250 (Gregory and Walling, 1973) with the exponent 0.5 (Smart, 1972). We used RDS and LMH  
251 (livestock and hippos) density per sampling site as independent variables against which  
252 longitudinal changes in fractional contributions of periphyton, C3 and C4 carbon to  
253 invertebrates in the river were explored using simple linear regression (SLR). Relationships  
254 were tested separately for the different FFGs.

255 Data on livestock (cattle, sheep, goats, and donkeys) and wildlife (ungulates and hippos)  
256 numbers were obtained from Development Plans for Bomet and Narok Districts (Plan, 2007,  
257 2008), Ministry of Agriculture and Livestock Production, and Kenya National Bureau of  
258 Statistics reports (KNBS-IHBS, 2007; KNBS-LS, 2009; KNBS, 2016, 2018), and other  
259 unpublished and published reports (Ottichilo et al., 2000; Lamprey and Reid, 2004; Kanga et  
260 al., 2011; Kiambi et al., 2012; Ogutu et al., 2016). For livestock and other LMH, density was  
261 expressed as the number of individuals per km<sup>2</sup> in the catchment area of the river sampling  
262 site, while for hippos, count data were expressed as the number of individuals per river km.

263 We used generalized additive models (GAMs) (Wood, 2017) to assess how the relative  
264 importance of C3 carbon, C4 carbon and periphyton for individual FFGs and all FFGs  
265 combined varied with stream size (RDS) and density of LMH. GAMs incorporate smooth  
266 functions that are more flexible in modelling nonlinear relationships (Hastie and Tibshirani,  
267 1990). Typically, the importance of different sources of carbon varies non-linearly with  
268 stream order or distance from the source (Vannote et al., 1980). GAMs were built using  
269 penalized cubic regression splines with degrees of freedom automatically identified based on  
270 the generalized cross-validation score (GCV) using the mgcv-package (Wood and Wood,  
271 2015) in the R platform (R-Development-Core-Team, 2017). GAMs were used further to  
272 investigate the influence of region, stream size (RDS) and LMH density, including potential

273 interactions, on the relative importance of the three sources of carbon for FFGs in the river.  
274 GAMs included region, RDS and LMH density as fixed effects, and individual sampling sites as  
275 a random effect. All analyses were performed using R 3.4.4 (Team, 2017).

## 276 **3. Results**

### 277 **3.1 Physico-chemical variables**

278 There was spatial variation in many physical and chemical variables (Table 1). LMH density  
279 increased with the proportion of forest cover and decreased with the proportion of  
280 grassland. Electrical conductivity and water temperature increased with LMH density but  
281 were low at the forested, low livestock density and agricultural regions/ sites (Table 1). Apart  
282 from the hippo sites, there were no differences in river distance from the source (RDS), river  
283 width, depth, or discharge among the five regions.

### 284 **3.2 Basal resources**

285 The C3 and C4 plants collected at the various sites did not differ significantly in  $\delta^{13}\text{C}$  and  $\delta^{15}\text{N}$   
286 (Table 1), nevertheless mean isotopic signatures were calculated for each of three elevation  
287 levels for use in the MixSIAR models. The  $\delta^{15}\text{N}$  values of C4 plants were generally higher than  
288 those of C3 plants.  $\delta^{13}\text{C}$ , but not  $\delta^{15}\text{N}$ , of cattle dung, varied considerably among sites and  
289 regions (Table 2). In contrast,  $\delta^{13}\text{C}$  and  $\delta^{15}\text{N}$  of hippo dung showed little variation among  
290 regions with hippos.  $\delta^{13}\text{C}$  and  $\delta^{15}\text{N}$  of periphyton were highly variable among sites and  
291 regions (Figure 2, Table 1); specifically, agricultural and livestock sites had elevated  $\delta^{15}\text{N}$   
292 values compared to forested areas and the MMNR, where hippos had a strong influence

293 (Figure 2). In MixSIAR models, site-specific isotopic signatures were used for all resources  
294 with detectable variation among regions.

### 295 **3.3 Longitudinal trends in basal resources**

296 Longitudinal patterns in  $\delta^{13}\text{C}$  of periphyton in the Mara River were wedge-shaped (Figure 2).  
297 Periphyton  $\delta^{13}\text{C}$  responded to both measures of stream size RDS ( $r = 0.23$ ,  $p < 0.01$ ) and  
298 stream order ( $r = 0.35$ ,  $p < 0.01$ ). At shorter RDS, agricultural and low density (LD) livestock  
299 sites had the widest range of periphyton  $\delta^{13}\text{C}$ , while values at forested sites were invariably  
300 low ( $-25.9 \pm 2.6\%$ , Table 2). The narrowest ranges of  $\delta^{13}\text{C}$  were recorded for high density (HD)  
301 livestock and hippo sites, which appeared at longer RDS. At these sites,  $\delta^{13}\text{C}$  (HD livestock: -  
302  $23.2 \pm 1.2\%$ , hippo sites:  $-22.7 \pm 1.8\%$ ) was on average higher than at forested sites.  $\delta^{13}\text{C}$  of  
303 periphyton was positively related to agricultural land use ( $r = 0.24$ ,  $p < 0.05$ ) and negatively  
304 to forest cover ( $r = -0.44$ ,  $p < 0.01$ ). Overall, periphyton  $\delta^{13}\text{C}$  responded positively to LMH  
305 density ( $r = 0.52$ ,  $p < 0.01$ ), which itself was highly positively correlated with % grassland  
306 cover in the catchment ( $r = 0.89$ ,  $p < 0.01$ ).

307 Longitudinal patterns of periphyton  $\delta^{15}\text{N}$  were similar to  $\delta^{13}\text{C}$ , yet we could not detect a  
308 significant change of the mean value with any measure of stream size. Periphyton  $\delta^{15}\text{N}$  was  
309 higher at agricultural and LD livestock sites (Figure 2) with shorter RDS, but lower at both the  
310 forested sites with short RDS and hippo sites at longer RDS. Unexpectedly,  $\delta^{15}\text{N}$  at LD  
311 livestock sites also surpassed HD livestock sites.  $\delta^{15}\text{N}$  of periphyton was positively related to  
312 agricultural land use ( $r = 0.29$ ,  $p < 0.01$ ) and negatively to forest cover ( $r = -0.31$ ,  $p < 0.01$ ).  
313 Interestingly, there was no significant relationship between  $\delta^{15}\text{N}$  of periphyton and LMH  
314 density.

### 315 **3.4 Importance of different carbon sources for invertebrates**

316 A total of 47 taxa in the five macroinvertebrate FFGs were collected in the study area (Table  
317 S1). The importance of C3 vegetation, C4 grasses and periphyton for invertebrates differed  
318 among the five regions, but patterns were similar for scrapers and collectors (Figure 3).  
319 Overall, periphyton was either the major or second-most important source of carbon for all  
320 FFGs at forested, agricultural and livestock sites, and predators were more reliant on this  
321 energy pathway than the rest of the FFGs (Figure 3). Except for shredders in forested  
322 streams, the importance of C3 vegetation was reduced for the rest of FFGs in the other  
323 regions and was lowest at the hippo sites. On the contrary, the importance of C4 carbon  
324 responded strongly to LMH density and was the most important source of carbon (>50%) for  
325 all FFGs at hippo sites, except shredders (Figure 3).

326 Source contributions followed similar patterns for all FFGs except predators and shredders  
327 (Figure 3). Predators seemed to draw most of their nutrition from the periphyton pathway at  
328 all sites except those with hippos. Shredders, on the other hand, displayed an overreliance  
329 on C3 vegetation as their main source of carbon at all sites, which is consistent with their  
330 feeding habits on coarse particulate organic matter, i.e., mostly leaves of C3 vegetation of  
331 terrestrial origin. Thus, shredders were least influenced by inputs of C4 carbon into the river  
332 via LMH.

### 333 **3.5 Longitudinal trends in the importance of different carbon sources**

334 We explored relationships between stream size (i.e., river distance from the source, RDS)  
335 and LMH density as predictors of the importance of the three differentiated sources of  
336 carbon (C3 vegetation, C4 grasses and periphyton) for macroinvertebrates in the Mara River



337 (Figure 4). The relative importance (fractional contribution) of the three sources of carbon  
338 changed with stream size (RDS) and LMH density (Figure 4a, b). Periphyton was the most  
339 important source of energy in headwater and mid-sized streams, contributing on average  
340 more than 40% to invertebrate biomass, but decreased to the second most important source  
341 of carbon further downstream. C3 vegetation (woody vegetation) was almost as important  
342 as periphyton in headwater streams, contributing nearly 40%, but its importance declined  
343 from mid-sized streams onwards, becoming the least important source of carbon with  
344 contributions <20% in large river sections (Figure 4a). C4 plants (grasses) were not relevant  
345 in small streams contributing less than 20% to invertebrates' energy requirements, but their  
346 importance markedly increased in mid-sized and large river sections, where they became the  
347 dominant source of energy with a contribution of nearly 60% to the total energy  
348 requirements for macroinvertebrates. The influence of LMH on the longitudinal importance  
349 of carbon sources for macroinvertebrates in the river (Figure 4b) mirrored that of RDS,  
350 although patterns for C4 carbon were stronger. Patterns with stream order as a proxy for  
351 stream size were identical to those with RDS (data not shown).

352 We also explored longitudinal relationships between stream size (i.e., river distance from the  
353 source, RDS) and LMH density as predictors of the importance of the three sources of carbon  
354 (C3 vegetation, C4 grasses and periphyton) for individual FFGs (Figure 5). There were  
355 significant positive relationships (linear regressions,  $p < 0.05$ ) between RDS and the  
356 importance of C4 to all FFGs except shredders (Figure 5g, h). In parallel, C3 carbon from  
357 terrestrial vegetation became less important with RDS for collector-filters (Figure 5a, b) and  
358 collector-gatherers (Figure 5c, d). Also, LMH density had strong influences on the importance  
359 of carbon sources for all FFGs except shredders, by reducing the contribution of C3 while

360 increasing that of C4 carbon. As expected, shredders were mainly reliant on C3 vegetation  
361 and were neither influenced by stream size nor LMH density (Figure 5g, h).

362 We found a significant influence of stream size and region on the relative importance of C3  
363 and C4 carbon for combined and individual FFGs, except shredders, in the river (Table 2). The  
364 independent effects of LMH density on the relative importance of C4 carbon was limited to  
365 scrapers and predators only, implying increasing LMH density did not necessarily increase  
366 the importance of C4 carbon for invertebrates. This is in agreement with observations that  
367 livestock increased the importance of periphyton while hippos increased the importance of  
368 C4 carbon for most FFGs, but increasing densities of both livestock and hippos decreased the  
369 importance of C3 carbon for invertebrates (Figure 3). There were significant interactions  
370 between LMH density and region in the importance of C4 carbon for all FFGs, except  
371 shredders. Overall, patterns in the importance of the three sources of carbon for predators  
372 were similar to those of all FFGs combined.

373 To eliminate potential confounding by organic matter and nutrient inputs by other  
374 agricultural activities not associated with LMH, the influence of stream size and LMH density  
375 on the relative importance of carbon sources for invertebrate FFGs were evaluated in  
376 forested sites only where LMH (both livestock and wildlife) were limited (Supplementary  
377 Information, Figures S1). Remarkably, no major effect of stream size was noted for most  
378 FFGs, further reinforcing the important role of LMH as drivers of food resources for  
379 macroinvertebrates in the river.

380

381

## 382 **4. Discussion**

383 This study shows that the importance of different sources of carbon for consumers in  
384 savanna rivers is spatially variable in response to changes in abundance and distribution of  
385 large mammalian herbivores, both livestock and wildlife, and stream size or river distance  
386 from the source. Overall, (i) periphyton was the most important source of energy for  
387 macroinvertebrates in low order and mid-sized rivers, (ii) periphyton and C4 vegetation  
388 became more important carbon sources at the cost of C3 plants at high-density livestock and  
389 hippo sites, respectively, and (iii) lower sections of the river hosting large populations of  
390 LMH relied largely on C4 vegetation with very little contributions of C3 plants. Our findings  
391 thus confirm our hypothesis of an overriding influence of LMH over stream size or location  
392 along the fluvial continuum in determining sources of carbon for food webs in savanna  
393 rivers.

394 Although previous studies in African savanna rivers have shown that LMH foster the  
395 importance of C4 carbon as a major source of carbon for aquatic consumers (Masese et al.  
396 2015, McCauley et al., 2015, Dawson et al., 2020), no study has evaluated the importance of  
397 these resource subsidies on entire gradients of rivers and at the scale that we have done in  
398 this study. The many stream sites sampled that differed in size and LMH density enabled us  
399 to evaluate the interaction of stream size with subsidy quantity as determinants for the base  
400 of riverine food webs. Our results depart from predictions on the importance of resources  
401 along the river continuum. While a reduction in the contribution of C3 carbon is  
402 hypothesized in mid-sized rivers as periphyton becomes dominant (Vannote et al., 1980;  
403 Thorp and Delong, 1994), an increase in the importance of fresh C4 vegetation inputs to mid-

404 sized and large rivers is less intuitive and not hypothesized in existing models of riverine  
405 ecosystem functioning. Instead, mid-sized and large rivers are thought to be  
406 disproportionately reliant on autochthonous production, and leakage of unutilized materials  
407 from upstream supply food webs of large rivers (Vannote et al., 1980, Thorp and Delong,  
408 2002; Thorp et al., 2006).

409 Although LMH density and the proportion of C4 grasses in the catchments were strongly  
410 correlated ( $r = 0.89$ ), the increased importance of C4 carbon in the diet of most  
411 macroinvertebrates in this study was assumed to be mediated via the vectoring role of LMH  
412 when they defecate in the river. Indeed, in the absence of LMH, the contribution of C4  
413 carbon to riverine food webs is less than expected based on areal landcover (Abrantes and  
414 Sheaves, 2010; Marwick et al., 2014), and given lower C4 vegetation height direct riparian  
415 inputs were minimal. Without LMH-mediation, C4 carbon would hardly reach aquatic food  
416 webs and dominance of C3 carbon could be expected in larger rivers, either supplied via  
417 leakage from upstream or through direct deposition from riparian vegetation. Headwater  
418 streams and riparian areas of most savanna rivers contain more C3 than C4 vegetation  
419 (Table 1), implying that LMH are the critical vectors for C4 carbon, especially during the dry  
420 season.

421 Although both livestock and hippos largely facilitated the disproportionate contribution of  
422 C4 carbon from grasses to invertebrates in the river, there were interesting differences in  
423 the contribution of other sources (C3 vegetation and periphyton) between sites receiving  
424 inputs by livestock and hippos, which can be linked to differences in the quality, amount and  
425 characteristics of the inputs these two types of LMH transfer into rivers (Iteba et al., 2021;  
426 Masese et al., 2020). While increasing livestock density increased both the importance of

427 periphyton and C4 carbon for macroinvertebrates in the river, hippo populations only  
428 increased the importance of C4 carbon further and reduced that of periphyton further  
429 (Figure 3). Although hippo dung has been reported to fertilize aquatic ecosystems increasing  
430 primary and secondary production (Grey and Harper, 2002; Mosepele et al., 2009), other  
431 studies have shown that large particles in hippo dung can have detrimental effects on  
432 benthic production, especially during the dry season when they settle at the bottom of hippo  
433 pools and downstream sections of rivers (Dawson et al., 2016; Dutton et al., 2018a, b).  
434 Hippos also spend long periods in the water for thermoregulation, approximately 12 h of  
435 daytime (Subalusky et al., 2015), and their wallowing activity is known to increase turbidity  
436 that can further limit primary production (Dutton et al., 2018). Comparative studies with  
437 cattle dung have also shown that the weakly digested hippo dung with high C: nutrients (N  
438 and P) ratios support heterotrophic microbial activity, while cattle dung with lower  
439 stoichiometric ratios can increase primary production faster (Subalusky et al., 2018; Masese  
440 et al., 2020). Thus, replacing wildlife (hippopotamus) with livestock (cattle) in savanna  
441 landscapes will most likely weaken detrital food web links based on allochthonous C3 and C4  
442 material (Dawson et al., 2020) and foster an algal-grazer food chain by increasing the  
443 abundance of autochthonous material.

444 The proportional acquisition of energy from terrestrial C3 and C4 plants and periphyton  
445 showed specific patterns for different FFGs (Zeug and Winemiller, 2008; Pingram et al.,  
446 2014). Further, the importance of different sources was influenced by land use and the  
447 density of LMH. For instance, in forested streams, there was no effect of stream size on the  
448 relative importance of the three sources (C3 and C4 producers and periphyton) for most of  
449 the FFGs (Figure S1). There was significant partitioning among FFGs on the utilization of

450 various resources, with scrapers and predators relying more on periphyton while collector-  
451 gatherers and, as expected, shredders relying more on C3 vegetation (Figure 1). However,  
452 facultative shredders, such as Potamonautidae (freshwater crabs) that dominated  
453 invertebrates most forested and agricultural streams, can obtain a significant amount of  
454 energy from periphyton during their omnivorous feeding (Masese et al., 2014). The  
455 importance of trophic sources was also related to the trophic position of the  
456 macroinvertebrates, with autochthonous production becoming more important with an  
457 increase in trophic level (Figures S1).

#### 458 **4.1 Longitudinal trends of the relative importance of trophic resources**

459 Even in the absence of LMH (both livestock and wildlife) longitudinal patterns of organic  
460 matter and nutrient loading into the Mara River and its tributaries (Figures 4 and 5) departed  
461 significantly from existing predictions for river continuum (Vannote et al., 1980; Thorp and  
462 Delong, 2002; Thorp et al., 2006). Periphyton, and not leaf litter from C3 vegetation, was the  
463 most important source of energy for invertebrates in low-order forested streams by  
464 contributing nearly 50%, on average, of the energy requirements of all invertebrates while  
465 C3 vegetation contributed no more than 40%. These results have been supported by  
466 previous studies in tropical and temperate regions whereby carbon from autochthonous  
467 production contributes significantly to aquatic animal biomass in mid-sized and large rivers  
468 despite forming a small proportion of available food resources (Douglas et al., 2005; Hayden  
469 et al., 2016).

470 The importance of C3 vegetation for invertebrates declined predictably in mid-sized rivers,  
471 but an expected rebound in lower reaches of the river where turbidity limits primary

472 production and the river becomes heterotrophic with an overreliance on fine particulate  
473 organic matter, mainly from C3 vegetation, escaping from upstream (Vannote et al., 1980),  
474 did not occur. Instead, the importance of C3 carbon further plummeted, while that of C4  
475 carbon, mediated by large populations of livestock and large wildlife (mainly hippos), gained  
476 more importance. Moreover, the expected increase in the importance of autochthonously  
477 produced carbon in large rivers (Thorp and Delong, 1994, 2002) did not occur, further  
478 highlighting the predominant role played by LMH as drivers of ecosystem productivity and  
479 functioning in savanna rivers (Stears et al., 2018; Subalusky et al., 2018; Dawson et al., 2020;  
480 Masese et al., 2020).

481 Recognizing that carbon flow in riverine food webs is context-dependent, both temporally in  
482 terms of flow variability and spatially in terms of the strength of lateral and longitudinal  
483 connectivity, it is conceivable that the patterns we report here are transient. However,  
484 studies during both the dry and wet seasons, have indicated the overriding influence of LMH  
485 inputs on river water quality and biogeochemistry (Stears et al., 2018; Dutton et al., 2018b,  
486 2020), ecosystem productivity (Subalusky et al., 2017, 2018), community composition and  
487 diversity of invertebrates and fishes (Masese et al., 2018; Stears et al., 2018). The  
488 discrepancies between the results of this study, on the relative importance of different  
489 sources of carbon for supporting riverine food webs on the fluvial continuum of savanna  
490 rivers, and existing models of riverine ecosystem functioning suggests that a new model is  
491 needed that recognizes the intimate linkage between terrestrial and aquatic ecosystems in  
492 savanna landscapes mediated by the active transfer of organic matter by LMH.

493

494 **5. Conclusions**

495 An understanding of terrestrial-aquatic ecosystems connectivity and the main sources of  
496 energy supporting riverine food webs is critical for the conservation and management of  
497 African savanna rivers. The novel findings of this study show the distinct functioning of these  
498 rivers in terms of the major energy sources fuelling food webs along their riverine continuum  
499 and highlight the important role played by LMH as vectors enhancing aquatic productivity  
500 through strengthened terrestrial-aquatic subsidy fluxes. We show that terrestrial and  
501 autochthonous sources of energy are relatively important along the longitudinal gradient of  
502 savanna rivers, and identify LMH as critically enhancing the contribution of C4 carbon far  
503 above potential contributions in their absence. The findings of this study also show that  
504 different resources are partitioned among macroinvertebrates depending on their feeding  
505 modes and location on the fluvial continuum. At a local scale, this study presents further  
506 evidence on the species-specific influences of different species of LMH on the functioning of  
507 aquatic ecosystems in African savannas. It also suggests that replacing native populations of  
508 large herbivores (such as hippos) with livestock (such as cattle) may alter the major sources  
509 of energy supporting aquatic communities in savanna rivers, with consequences on  
510 ecosystem structure and functioning.

511 **Acknowledgements**

512 We are grateful to Mary Kiplagat (University of Eldoret) and Evans Ole Keshe (Mario Tours)  
513 for assistance in the field. We are grateful to Tobias Goldhammer, Sarah Krockner and Claudia  
514 Schmalsch for help during the analysis of water chemistry samples at IGB, Berlin. We thank  
515 Susanne Remus for stable isotope analysis at the ZALF. We thank Narok County for granting



516 us access to the Mara Triangle. This is a publication of the MaMeMa Project and was funded,  
517 in part, by an Alexander von Humboldt Postdoc fellowship to FOM; and an ERC Research  
518 grant to GS.

519

## 520 **References**

521 Abrantes, K. G., Sheaves, M., 2010. Importance of freshwater flow in terrestrial-aquatic  
522 energetic connectivity in intermittently connected estuaries of tropical Australia.

523 *Marine Biology* 157, 2071-2086.

524 Anderson, C. Cabana, G., 2005.  $\delta^{15}\text{N}$  in riverine food webs: effects of N inputs from  
525 agricultural watersheds. *Canadian Journal of Fisheries and Aquatic Sciences* 62, 333-

526 340.

527 Atkinson, C. L., Capps, K. A., Rugenski, A. T., Vanni, M. J., 2017. Consumer-driven nutrient  
528 dynamics in freshwater ecosystems: From individuals to ecosystems. *Biological*

529 *Reviews* 92, 2003-2023.

530 Bunn, S. E., Leigh, C., Jardine, T. D., 2013. Diet-tissue fractionation of  $\delta^{15}\text{N}$  by consumers  
531 from streams and rivers. *Limnology and Oceanography* 58(3): 765-773.

532 Dawson, J., Pillay, D., Perissinotto, R., Richoux' N. B., 2020. Fatty acid analyses provide novel  
533 insights on hippo defecation and consequences for aquatic food webs. *Scientific*

534 *Reports* 10(1): 1-15.

535 Dawson, J., Pillay, D., Roberts, P. J., Perissinotto, R., 2016. Declines in benthic

536 macroinvertebrate community metrics and microphytobenthic biomass in an estuarine  
537 lake following enrichment by hippo dung. *Scientific Reports* 6, 37359.

- 538 Doughty, C.E., Wolf, A., Malhi, Y., 2013. The impact of large animal extinctions on nutrient  
539 fluxes in early river valley civilizations. *Ecosphere* 4, art148.
- 540 Douglas, M.M., Bunn, S.E., Davies, P.M., 2005. River and wetland food webs in Australia's  
541 wet-dry tropics: general principles and implications for management. *Marine and*  
542 *Freshwater Research* 56, 329-342.
- 543 Dutton, C.L., Subalusky, A.L., Hamilton, S.K., Rosi, E.J., Post, D.M., 2018a. Organic matter  
544 loading by hippopotami causes subsidy overload resulting in downstream hypoxia and  
545 fish kills. *Nature Communications* 9, 1951.
- 546 Dutton, C.L., Subalusky, A.L., Anisfeld S.C., Njoroge, L., Rosi E. J., Post, D.M., 2018b. The  
547 influence of a semi-arid sub-catchment on suspended sediments in the Mara River,  
548 Kenya. *PloS one* 13, e0192828.
- 549 Dutton, C. L., Subalusky, A.L., Hamilton, S.K., Bayer, E.C., Njoroge, L., Rosi, E.J., Post, D.M.,  
550 2021. Alternative Biogeochemical States of River Pools Mediated by Hippo Use and  
551 Flow Variability. *Ecosystems*, 24, 284-300.
- 552 Gregory, K.J. Walling, D. E., 1973. Drainage basin form and process: a geomorphological  
553 approach. Wiley, New York, p 456.
- 554 Grey, J., Harper, D., 2002. Using stable isotope analyses to identify allochthonous inputs to  
555 Lake Naivasha mediated via the hippopotamus gut. *Isotopes in environmental and*  
556 *health studies* 38, 245-250.
- 557 Hastie, T.J., Tibshirani, R.J., 1990. Generalized additive models, CRC press.
- 558 Hayden, B., McWilliam-Hughes, S.M., Cunjak, R.A., 2016. Evidence for limited trophic  
559 transfer of allochthonous energy in temperate river food webs. *Freshwater Science* 35,  
560 544-558.

- 561 Hulot, F.D., Prijac, A., Lefebvre, J.-P., Msiteli-Shumba, S., Kativu, S., 2019. A first assessment  
562 of megaherbivore subsidies in artificial waterholes in Hwange National Park,  
563 Zimbabwe. *Hydrobiologia* 837, 161-175.
- 564 Iteba, J.O., Thomas, H., Singer, G.A., Masese, F.O., 2021. Livestock as vectors of  
565 organic matter and nutrient loading in aquatic ecosystems in African savannahs. *PLOS*  
566 *ONE*. In Revision.
- 567 Jackson, A., Mccarter P., 1994. A Profile of the Mau Forest Complex. KEFCO, Nairobi.
- 568 Kanga, E.M., Ogutu, J.O., Olff, H., Santema, P. 2011. Population trend and distribution of the  
569 Vulnerable common hippopotamus *Hippopotamus amphibius* in the Mara Region of  
570 Kenya. *Oryx* 45, 20-27.
- 571 Kanga, E.M., Ogutu, J.O., Piepho, H.-P., Olff, H., 2013. Hippopotamus and livestock grazing:  
572 influences on riparian vegetation and facilitation of other herbivores in the Mara  
573 Region of Kenya. *Landscape and Ecological Engineering* 9, 47-58.
- 574 Kiambi, S., Kuloba, B., Kenana, L., Muteti, D., Mwenda, E., 2012. Wet season aerial count of  
575 large herbivores in Masai Mara National Reserve and the adjacent community areas  
576 (June 2010). Narok: Mara Research Station, Kenya Wildlife Service.
- 577 KNBS-IHBS, 2007. Kenya National Bureau of Statistics (KNBS)-Kenya Integrated Household  
578 Budget Survey (KIHBS)—2005/06.
- 579 KNBS-LS. 2009. Livestock population by type and district. Nairobi: Census KNBS.
- 580 KNBS 2016. Livestock statistics. Kenya National Bureau of Statistics.
- 581 KNBS (2018). Economic Survey 2018.
- 582 Lamberti, G.A., Chaloner, D.T., Hershey, A.E. 2010. Linkages among aquatic ecosystems.  
583 *Journal of the North American Benthological Society* 29, 245-263.

- 584 Lamprey, R.H., Reid R.S., 2004. Expansion of human settlement in Kenya's Maasai Mara:  
585 what future for pastoralism and wildlife? *Journal of Biogeography* 31, 997-1032.
- 586 Lau, D.C., Leung, K.M., Dudgeon, D., 2009. Are autochthonous foods more important than  
587 allochthonous resources to benthic consumers in tropical headwater streams? *Journal*  
588 *of the North American Benthological Society* 28, 426-439.
- 589 Lee, K.Y., Graham, L., Spooner D.E., Xenopoulos, M., 2018. Tracing anthropogenic inputs in  
590 stream foods webs with stable carbon and nitrogen isotope systematics along an  
591 agricultural gradient. *PloS one* 13(7).
- 592 Marwick, T.R., Borges, A.V., Van Acker, K., Darchambeau, F., Bouillon, S., 2014.  
593 Disproportionate contribution of riparian inputs to organic carbon pools in freshwater  
594 systems. *Ecosystems* 17, 974-989.
- 595 Masese, F.O., Abrantes, K.G., Gettel, G.M., Bouillon, S., Irvine, K., McClain M.E., 2015. Are  
596 Large Herbivores Vectors of Terrestrial Subsidies for Riverine Food Webs? *Ecosystems*  
597 18, 686-706.
- 598 Masese, F.O., Abrantes, K.G., Gettel, G.M., Bouillon, S., Irvine, K., McClain M.E., 2018.  
599 Trophic structure of an African savanna river and organic matter inputs by large  
600 terrestrial herbivores: A stable isotope approach. *Freshwater Biology* 63, 1365-1380.
- 601 Masese, F.O., Kiplagat, M.J., Gonzalez-Quijano, C.R., Subalusky, A.L., Dutton, C.L., Post, D.M.,  
602 Singer, G.A., 2020. Hippopotamus are distinct from domestic livestock in their resource  
603 subsidies to and effects on aquatic ecosystems. *Proc Biol Sci* 287(1926), 20193000.
- 604 Masese, F.O., Kitaka, N., Kipkemboi, J., Gettel, G.M., Irvine, K., McClain, M.E., 2014.  
605 Macroinvertebrate functional feeding groups in Kenyan highland streams: evidence for  
606 a diverse shredder guild. *Freshwater Science* 33, 435-450.

- 607 Mati, B.M., Mutie, S., Gadain, H., Home, P., Mtalo, F., 2008. Impacts of land-use/cover  
608 changes on the hydrology of the transboundary Mara River, Kenya/Tanzania. *Lakes &*  
609 *Reservoirs: Research & Management* 13, 169-177.
- 610 McCauley, D.J., Dawson, T.E., Power, M.E., Finlay, J.C., Ogada, M., Gower, D.B., Caylor, K.,  
611 Nyingi, W.D., Githaiga, J.M., Nyunja, J., Joyce, F.H., Lewison, R.L., Brashares, J.S., 2015.  
612 Carbon stable isotopes suggest that hippopotamus-vectored nutrients subsidize  
613 aquatic consumers in an East African river. *Ecosphere* 6, 1-11.
- 614 McCutchan Jr, J.H., Lewis Jr, W.M., Kendall, C., McGrath, C.C., 2003. Variation in trophic shift  
615 for stable isotope ratios of carbon, nitrogen, and sulfur. *Oikos* 102, 378-390.
- 616 Merritt, R.W., Cummins, K.W., Berg, M.B., 2017. Trophic relationships of  
617 macroinvertebrates. *Methods in Stream Ecology, Volume 1, Elsevier*: 413-433.
- 618 Mosepele, K., Moyle, P.B., Merron, G.S., Purkey, D.R., Mosepele, B. 2009. Fish, Floods, and  
619 Ecosystem Engineers: Aquatic Conservation in the Okavango Delta, Botswana.  
620 *BioScience* 59, 53-64.
- 621 Naiman, R.J., Rogers, K.H., 1997. Large animals and system-level characteristics in river  
622 corridors. *BioScience* 47, 521-529.
- 623 Ogutu, J.O., H.-P. Piepho, H.-P., Said, M.Y., Ojwang, G.O., Njino, L., Kifugo, S.C., Wargute,  
624 P.W., 2016. Extreme Wildlife Declines and Concurrent Increase in Livestock Numbers in  
625 Kenya: What Are the Causes? *PLOS ONE* 11, e0163249.
- 626 Ottichilo, W.K., Grunblatt, J., Said, M.Y., Wargute, P.W., 2000. Wildlife and livestock  
627 population trends in the Kenya rangeland. *Wildlife conservation by sustainable use,*  
628 *Springer*: 203-218.

- 629 Parnell, A.C., Inger R., Bearhop, S., Jackson, A.L., 2010. Source partitioning using stable  
630 isotopes: coping with too much variation. *PLOS ONE* 5(3).
- 631 Plan, D.D., 2007. Effective management for sustainable economic growth and poverty  
632 reduction, Bomet District 2002-2008.
- 633 Plan, D.D., 2008. Effective management for sustainable economic growth and poverty  
634 reduction, Narok District 2002-2008.
- 635 Qi, H., Coplen, T.B., Geilmann, H., Brand, W.A., Böhlke, J.K., 2003. Two new organic  
636 reference materials for  $\delta^{13}\text{C}$  and  $\delta^{15}\text{N}$  measurements and a new value for the  $\delta^{13}\text{C}$  of  
637 NBS 22 oil. *Rapid Communications in Mass Spectrometry* 17, 2483-2487.
- 638 Rasmussen, J.B., Trudeau, V., Morinville, G., 2009. Estimating the scale of fish feeding  
639 movements in rivers using  $\delta^{13}\text{C}$  signature gradients. *Journal of animal ecology* 78, 674-  
640 685.
- 641 Smart, J., 1972. Quantitative characterization of channel network structure. *Water*  
642 *Resources Research* 8, 1487-1496.
- 643 Stears, K., McCauley, D.J. Finlay, J.C., Mpemba, J., Warrington, I.T., Mutayoba, B.M., Power,  
644 M.E., Dawson T.E., Brashares J.S., 2018. Effects of the hippopotamus on the chemistry  
645 and ecology of a changing watershed. *Proceedings of the National Academy of*  
646 *Sciences*. 115(22), E5028-E5037. <https://doi.org/10.1073/pnas.1800407115>
- 647 Stock, B.C., Semmens, B.X., 2013. MixSIAR GUI user manual, version 1.0. Accessible online at:  
648 <http://conserver.iugo-cafe.org/user/brice.semmens/MixSIAR>.
- 649 Subalusky, A.L., Dutton, C.L., Njoroge, L., Rosi E.J., Post D.M., 2018. Organic matter and  
650 nutrient inputs from large wildlife influence ecosystem function in the Mara River,  
651 Africa. *Ecology* 99, 2558-2574.

- 652 Subalusky, A.L., Dutton, C.L., Rosi-Marshall, E.J., Post D.M., 2015. The hippopotamus  
653 conveyor belt: vectors of carbon and nutrients from terrestrial grasslands to aquatic  
654 systems in sub-Saharan Africa. *Freshwater Biology* 60, 512-525.
- 655 Subalusky, A.L., Dutton C.L., Rosi E.J., Post, D.M., 2017. Annual mass drownings of the  
656 Serengeti wildebeest migration influence nutrient cycling and storage in the Mara  
657 River. *Proceedings of the National Academy of Sciences* 114,7647-7652.
- 658 Subalusky, A.L., Post, D.M. 2019. Context dependency of animal resource subsidies. *Biol Rev*  
659 *Camb Philos Soc* 94, 517-538.
- 660 Team, R.C., 2017. R: A language and environment for statistical computing (Version 3.4.  
661 2)[Computer software]. Vienna, Austria: R Foundation for Statistical Computing.
- 662 Thorp, J.H., Delong, M.D., 1994. The Riverine Productivity Model: An Heuristic View of  
663 Carbon Sources and Organic Processing in Large River Ecosystems. *Oikos* 70, 305-308.
- 664 Thorp, J.H., Delong, M.D., 2002. Dominance of autochthonous autotrophic carbon in food  
665 webs of heterotrophic rivers. *Oikos* 96, 543-550.
- 666 Thorp, J.H., Thoms, M.C., Delong, M.D., 2006. The riverine ecosystem synthesis:  
667 biocomplexity in river networks across space and time. *River Research and*  
668 *Applications* 22, 123-147.
- 669 Vanni, M. J., 2002. Nutrient cycling by animals in freshwater ecosystems. *Annual Review of*  
670 *Ecology and Systematics* 33, 341-370.
- 671 Vannote, R. L., Minshall, G.W., Cummins, K.W., Sedell, J.R., Cushing, C.E. 1980. The river  
672 continuum concept. *Canadian journal of fisheries and aquatic sciences* 37, 130-137.

- 673 Veldhuis, M.P., Ritchie, M.E., Ogutu, J.O., Morrison, T.A., Beale, C.M., Estes, A.B. Mwakilema,  
674 W., Ojwang, G.O., Parr C.L., Probert J. 2019. Cross-boundary human impacts  
675 compromise the Serengeti-Mara ecosystem. *Science* 363, 1424-1428.
- 676 Webster, J.R., Benfield, E.F., Ehrman, T.P., Schaeffer, M.A., Tank, J.L., Hutchens J.J., D'Angelo  
677 D.J., 1999. What happens to allochthonous material that falls into streams? A synthesis  
678 of new and published information from Coweeta. *Freshwater Biology* 41, 687-705.
- 679 Wipfli, M. S., Richardson, J. S., Naiman, R. J., 2007. Ecological Linkages Between Headwaters  
680 and Downstream Ecosystems: Transport of Organic Matter, Invertebrates, and Wood  
681 Down Headwater Channels 1. *JAWRA Journal of the American Water Resources*  
682 *Association* 43, 72-85.
- 683 Wood, S. Wood, M. S., 2015. Package 'mgcv'. R package version: 1-7.
- 684 Wood, S. N., 2017. *Generalized additive models: an introduction with R*, CRC press.



685 **Figure captions**

686 **Figure 1.** Map of the Mara River catchment showing the position of the sampling sites.

687 **Figure 2.** Longitudinal trends in the mean ( $\pm$ SD) of (a)  $\delta^{13}\text{C}$  and (b)  $\delta^{15}\text{N}$  values (‰) of  
688 periphyton with increasing stream size in the Mara River and its tributaries. FOR = forested  
689 sites, AGR = agriculture sites, LD\_Livestock = low density livestock sites, HD\_Livestock = high  
690 density livestock sites, and Hippos = hippopotamus sites.

691 **Figure 3.** Box-and-whisker plots of fractional contributions of C3 vegetation (grey), C4  
692 grasses (light grey) and periphyton (dark grey) to all macroinvertebrates FFGs in the Mara  
693 River. (a) all taxa, (b) collector-gatherers, (c) predators, (d) collector-filterers (e) shredders,  
694 and (f) scrapers. C3 = C3 plants; C4 = C4 plants.

695 **Figure 4.** Longitudinal trends in source contributions to macroinvertebrates along the Mara  
696 River. Longitudinal variability in the relative importance (fractional contribution) of C3  
697 vegetation (sky blue), C4 grasses (orange) and periphyton (dark green) as sources of carbon  
698 for macroinvertebrates in the Mara River in response to changes in (a) river distance from  
699 the source (RDS in km) and (b) density of large mammalian herbivores (LMH Density). To test  
700 the significance of the relationships, we fitted a GAM model with a smoothing function. The  
701 black line with shaded area represents smoother mean and s.e.; smoother significance,  $R^2$   
702 and GCV are supplied in the figures.

703 **Figure 5.** Source contributions to FFGs along the Mara River. Longitudinal trends in fractional  
704 contributions of trophic source (C3= C3 vegetation, C4 = C4 grasses and periphyton) to  
705 macroinvertebrate functional feeding groups (FFGs) in the Mara River. Source contributions

706 are assessed in response to changes in river distance from source (RDS) as a measure of  
707 stream size (a, c, e, g, i) and density of large mammalian herbivores (LMH), b, d, f, h, j). a, b =  
708 collector-filterers, c, d = collector-gatherers, e, f = scrapers, g, h = shredders, and i, j =  
709 predators. To test the significance of the relationships, we fitted a GAM model with a  
710 smoothing function. The black line with shaded area represents smoother mean and s.e.;  
711 smoother significance,  $R^2$  and GCV are supplied in the figures. Note changes on the x-axis  
712 and y-axis.  
713

714 **Table 1.** River size, the density of large mammalian herbivores, catchment land use characteristics and  $\delta^{13}\text{C}$  and  $\delta^{15}\text{N}$  values of the main carbon  
 715 sources (periphyton, C3 and C4 carbon, dung) across 80 sites of the Mara River, Kenya, grouped into five regions: Forested, Agricultural, with  
 716 low density (LD) livestock, with high density (HD) livestock, and with a dominance of hippos. All values are means ( $\pm$  SD) and  $\delta^{13}\text{C}$  and  $\delta^{15}\text{N}$   
 717 values are in ‰ units.

| Characteristics                                  | Regions                        |                                 |                                |                                |                                 | Statistics |           |
|--------------------------------------------------|--------------------------------|---------------------------------|--------------------------------|--------------------------------|---------------------------------|------------|-----------|
|                                                  | Forested                       | Agricultural                    | LD livestock                   | HD livestock                   | Hippos                          | F - value  | p - value |
| <b>Stream and sub-catchment characteristics</b>  |                                |                                 |                                |                                |                                 |            |           |
| Stream order                                     | 4.0 $\pm$ 1.5 <sup>a</sup>     | 3.7 $\pm$ 1.6 <sup>a</sup>      | 4.8 $\pm$ 2.1 <sup>ab</sup>    | 4.0 $\pm$ 1.9 <sup>a</sup>     | 6.4 $\pm$ 1.6 <sup>b</sup>      | 5.26       | 0.001     |
| River distance from source (RDS)                 | 12.5 $\pm$ 6.4 <sup>a</sup>    | 12.2 $\pm$ 9.2 <sup>a</sup>     | 26.0 $\pm$ 17.4 <sup>b</sup>   | 17.2 $\pm$ 15.8 <sup>ab</sup>  | 52.6 $\pm$ 23.2 <sup>b</sup>    | 7.37       | 0.001     |
| LMH density (individuals / km <sup>2</sup> )     | 9.3 $\pm$ 4.1 <sup>a</sup>     | 28.0 $\pm$ 16.8 <sup>b</sup>    | 44.8 $\pm$ 12.5 <sup>b</sup>   | 102.9 $\pm$ 17.7 <sup>c</sup>  | 111.9 $\pm$ 10.8 <sup>c</sup>   | 11.21      | 0.001     |
| % Agriculture                                    | 27.1 $\pm$ 24.9 <sup>a</sup>   | 61.1 $\pm$ 22.2 <sup>b</sup>    | 63.5 $\pm$ 23.9 <sup>b</sup>   | 1.9 $\pm$ 0.5 <sup>c</sup>     | 22.4 $\pm$ 17.3 <sup>ab</sup>   | 18.91      | 0.001     |
| % Grasslands                                     | 5.6 $\pm$ 5.2 <sup>a</sup>     | 7.2 $\pm$ 5.1 <sup>a</sup>      | 16.5 $\pm$ 13.9 <sup>b</sup>   | 59.9 $\pm$ 10.8 <sup>c</sup>   | 49.2 $\pm$ 16.0 <sup>c</sup>    | 93.21      | 0.001     |
| % Forest                                         | 64.7 $\pm$ 28.5 <sup>a</sup>   | 39.3 $\pm$ 22.9 <sup>b</sup>    | 25.4 $\pm$ 15.4 <sup>b</sup>   | 37.2 $\pm$ 11.5 <sup>b</sup>   | 27.97 $\pm$ 8.9 <sup>b</sup>    | 9.47       | 0.001     |
| River width (m)                                  | 7.9 $\pm$ 5.0 <sup>a</sup>     | 7.1 $\pm$ 6.1 <sup>a</sup>      | 8.7 $\pm$ 5.8 <sup>a</sup>     | 6.6 $\pm$ 3.5 <sup>a</sup>     | 15.84 $\pm$ 9.9 <sup>b</sup>    | 4.35       | 0.003     |
| Water depth (m)                                  | 0.20 $\pm$ 0.1 <sup>a</sup>    | 0.2 $\pm$ 0.1 <sup>a</sup>      | 0.2 $\pm$ 0.2 <sup>a</sup>     | 0.2 $\pm$ 0.1 <sup>a</sup>     | 1.0 $\pm$ 0.4 <sup>b</sup>      | 5.45       | 0.001     |
| River discharge (m <sup>3</sup> /s)              | 0.23 $\pm$ 0.2 <sup>a</sup>    | 0.4 $\pm$ 0.2 <sup>a</sup>      | 0.5 $\pm$ 0.4 <sup>a</sup>     | 0.3 $\pm$ 0.2 <sup>a</sup>     | 17.4 $\pm$ 6.9 <sup>b</sup>     | 7.57       | 0.001     |
| pH (units)                                       | 7.6 $\pm$ 0.3 <sup>a</sup>     | 7.6 $\pm$ 0.3 <sup>a</sup>      | 7.7 $\pm$ 0.2 <sup>a</sup>     | 7.6 $\pm$ 0.1 <sup>a</sup>     | 7.8 $\pm$ 0.0 <sup>a</sup>      | 0.40       | 0.804     |
| Temperature (°C)                                 | 15.8 $\pm$ 1.8 <sup>a</sup>    | 18.5 $\pm$ 3.2 <sup>b</sup>     | 20.3 $\pm$ 2.5 <sup>b</sup>    | 23.7 $\pm$ 2.1 <sup>c</sup>    | 23.9 $\pm$ 2.2 <sup>c</sup>     | 27.9       | 0.001     |
| Dissolved oxygen (mgL <sup>-1</sup> )            | 7.8 $\pm$ 0.4 <sup>a</sup>     | 7.0 $\pm$ 1.1 <sup>bc</sup>     | 6.3 $\pm$ 0.9 <sup>c</sup>     | 7.3 $\pm$ 1.0 <sup>ab</sup>    | 8.0 $\pm$ 1.1 <sup>a</sup>      | 7.36       | 0.001     |
| Electrical conductivity ( $\mu\text{Scm}^{-1}$ ) | 74.1 $\pm$ 29.4 <sup>a</sup>   | 103.2 $\pm$ 50.0 <sup>a</sup>   | 260.3 $\pm$ 128.9 <sup>b</sup> | 309.0 $\pm$ 172.8 <sup>b</sup> | 325.0 $\pm$ 178.7 <sup>b</sup>  | 18.12      | 0.001     |
| <b>Stable isotopes of basal resources</b>        |                                |                                 |                                |                                |                                 |            |           |
| $\delta^{13}\text{C}$ of C3 vegetation           | -26.56 $\pm$ 2.08 <sup>a</sup> | -27.14 $\pm$ 3.37 <sup>a</sup>  | -27.62 $\pm$ 1.37 <sup>a</sup> | -25.36 $\pm$ 1.98 <sup>a</sup> | -26.13 $\pm$ 1.97 <sup>a</sup>  | 1.05       | 0.407     |
| $\delta^{13}\text{C}$ of C4 vegetation           | -13.22 $\pm$ 6.27 <sup>a</sup> | -12.08 $\pm$ 1.56 <sup>a</sup>  | -16.44 $\pm$ 7.95 <sup>a</sup> | -11.04 $\pm$ 2.13 <sup>a</sup> | -15.64 $\pm$ 11.01 <sup>a</sup> | 1.32       | 0.294     |
| $\delta^{13}\text{C}$ of periphyton              | -25.93 $\pm$ 2.58 <sup>a</sup> | -24.34 $\pm$ 2.64 <sup>ab</sup> | -23.7 $\pm$ 2.15 <sup>ab</sup> | -23.21 $\pm$ 1.23 <sup>b</sup> | -22.66 $\pm$ 1.80 <sup>b</sup>  | 4.24       | 0.004     |
| $\delta^{13}\text{C}$ of cattle dung             | -20.96 $\pm$ 7.31 <sup>a</sup> | -15.78 $\pm$ 2.36 <sup>ab</sup> | -13.49 $\pm$ 1.73 <sup>b</sup> | -14.27 $\pm$ 5.01 <sup>b</sup> | -13.58 $\pm$ 2.85 <sup>b</sup>  | 5.08       | 0.002     |
| $\delta^{13}\text{C}$ of hippo dung              | -                              | -                               | -                              | -11.89 $\pm$ 2.14 <sup>a</sup> | -14.13 $\pm$ 2.72 <sup>a</sup>  | 2.11       | 0.169     |
| $\delta^{15}\text{N}$ of C3 vegetation           | 4.06 $\pm$ 1.69 <sup>a</sup>   | 5.47 $\pm$ 4.96 <sup>a</sup>    | 5.24 $\pm$ 2.65 <sup>a</sup>   | 4.61 $\pm$ 2.36 <sup>a</sup>   | 3.37 $\pm$ 2.91 <sup>a</sup>    | 1.83       | 0.119     |
| $\delta^{15}\text{N}$ of C4 vegetation           | 6.09 $\pm$ 2.59 <sup>a</sup>   | 5.98 $\pm$ 3.07 <sup>a</sup>    | 4.76 $\pm$ 4.79 <sup>a</sup>   | 5.57 $\pm$ 3.25 <sup>a</sup>   | 4.81 $\pm$ 2.74 <sup>a</sup>    | 0.15       | 0.988     |
| $\delta^{15}\text{N}$ of periphyton              | 7.13 $\pm$ 0.84 <sup>a</sup>   | 7.56 $\pm$ 1.49 <sup>ab</sup>   | 8.53 $\pm$ 1.44 <sup>b</sup>   | 8.11 $\pm$ 0.79 <sup>b</sup>   | 7.29 $\pm$ 0.71 <sup>ab</sup>   | 3.16       | 0.019     |
| $\delta^{15}\text{N}$ of cattle dung             | 6.79 $\pm$ 1.79 <sup>a</sup>   | 5.37 $\pm$ 1.29 <sup>a</sup>    | 7.29 $\pm$ 0.94 <sup>a</sup>   | 5.89 $\pm$ 1.29 <sup>a</sup>   | 4.55 $\pm$ 0.20 <sup>a</sup>    | 1.34       | 0.257     |
| $\delta^{15}\text{N}$ of hippo dung              | -                              | -                               | -                              | 6.56 $\pm$ 1.96 <sup>a</sup>   | 4.93 $\pm$ 0.63 <sup>a</sup>    | 2.19       | 0.158     |

718

719 **Table 2.** Summary of generalized additive mixed models (GAMs) of the effects of stream size (river distance from source {RDS}), region and  
 720 density of large mammalian herbivores (LMH density) (stream size) on the relative importance (fractional contribution) of C3 vegetation (C3  
 721 carbon), C4 grasses (C4 carbon) and periphyton as sources of carbon/energy for macroinvertebrate FFGs (collector-filterers, collector-  
 722 gatherers, scrapers, predators and shredders) and all combined taxa (FFGs) in the Mara River, Kenya. RDS, region and LMH density were  
 723 treated as fixed factors while each study site was used a random factor. In all cases, d.f. = 1.

| Source Contributions                          | Macroinvertebrate FFGs |                     |                     |                  |              |                  |          |
|-----------------------------------------------|------------------------|---------------------|---------------------|------------------|--------------|------------------|----------|
|                                               | Sources                | Collector-filterers | Collector-gatherers | Scrapers         | Predators    | Shredders        | All taxa |
| <b>C3 carbon</b>                              |                        |                     |                     |                  |              |                  |          |
| RDS F, <i>p</i> -value                        | 21.21, <0.001***       | 17.01, <0.001***    | 21.14, <0.001***    | 12.48, <0.001*** | 0.26, 0.612  | 60.1, <0.001***  |          |
| Region F, <i>p</i> -value                     | 10.47, 0.002**         | 23.95, <0.001***    | 24.32, <0.001***    | 5.02, 0.028*     | 0.053, 0.819 | 39.7, <0.001***  |          |
| LMH density F, <i>p</i> -value                | 1.30, 0.260            | 3.32, 0.073         | 3.62, 0.062         | 0.02, 0.878      | 1.65, 0.208  | 6.12, 0.014*     |          |
| RDS x region F, <i>p</i> -value               | 2.15, 0.150            | 1.80, 0.185         | 3.45, 0.068         | 3.87, 0.053      | 1.51, 0.228  | 9.11, 0.003**    |          |
| RDS x LMH density F, <i>p</i> -value          | 0.09, 0.761            | 0.04, 0.846         | 0.001, 0.972        | 1.52, 0.222      | 1.72, 0.199  | 0.16, 0.691      |          |
| Region x LMH density F, <i>p</i> -value       | 0.03, 0.857            | 0.003, 0.957        | 0.04, 0.848         | 5.54, 0.022*     | 0.83, 0.371  | 0.24, 0.624      |          |
| RDS x region x LMH density F, <i>p</i> -value | 0.07, 0.796            | 0.06, 0.805         | 0.001, 0.972        | 0.01, 0.905      | 0.058, 0.812 | 0.02, 0.887      |          |
| Adj. R2                                       | 0.692                  | 0.365               | 0.401               | 0.227            | -0.024       | 0.271            |          |
| Scale est.                                    | 0.001                  | 0.0004              | 0.0005              | 0.001            | 0.019        | 0.014            |          |
| Residual deviance                             | 0.68                   | 0.949               | 0.903               | 0.817            | 0.774        | 5.44             |          |
| <b>C4 carbon</b>                              |                        |                     |                     |                  |              |                  |          |
| RDS F, <i>p</i> -value                        | 67.10, <0.001***       | 95.89, <0.001***    | 120.7, <0.001***    | 129.6, <0.001*** | 0.001, 0.969 | 481.1, <0.001*** |          |
| Region F, <i>p</i> -value                     | 45.18, <0.001***       | 60.52, <0.001***    | 74.21, <0.001***    | 111.7, <0.001*** | 0.60, 0.445  | 272.3, <0.001*** |          |
| LMH density F, <i>p</i> -value                | 1.13, 0.293            | 1.28, 0.262         | 3.45, 0.068         | 11.24, 0.001**   | 4.43, 0.043* | 13.7, <0.001***  |          |
| RDS x region F, <i>p</i> -value               | 1.58, 0.215            | 1.63, 0.207         | 0.55, 0.463         | 7.24, 0.009**    | 3.00, 0.093  | 9.82, 0.002**    |          |
| RDS x LMH density F, <i>p</i> -value          | 0.56, 0.460            | 0.80, 0.376         | 1.78, 0.187         | 18.06, <0.001*** | 0.09, 0.766  | 13.5, <0.001***  |          |
| Region x LMH density F, <i>p</i> -value       | 7.22, 0.010*           | 5.21, 0.026*        | 6.25, 0.015*        | 3.36, 0.072      | 0.36, 0.550  | 30.3 <0.001***   |          |
| RDS x region x LMH density F, <i>p</i> -value | 0.96, 0.333            | 0.03, 0.874         | 1.74, 0.192         | 8.85, 0.004**    | 3.92, 0.056  | 12.1 <0.001***   |          |
| Adj. R2                                       | 0.13                   | 0.699               | 0.747               | 0.795            | 0.121        | 0.739            |          |
| Scale est.                                    | 0.031                  | 0.002               | 0.002               | 0.001            | <0.001       | 0.004            |          |
| Residual deviance                             | 0.51                   | 0.351               | 0.300               | 0.315            | 0.066        | 1.43             |          |

**Periphyton**

|                                               |              |               |             |                  |               |                 |
|-----------------------------------------------|--------------|---------------|-------------|------------------|---------------|-----------------|
| RDS F, <i>p</i> -value                        | 0.05, 0.829  | 2.87, 0.095   | 2.24, 0.140 | 10.57, 0.002**   | 0.28, 0.599   | 10.9, 0.001**   |
| Region F, <i>p</i> -value                     | 0.10, 0.754  | 0.0004, 0.984 | 0.06, 0.805 | 15.05, <0.001*** | 0.0003, 0.976 | 4.5, 0.034*     |
| LMH density F, <i>p</i> -value                | 1.74, 0.194  | 1.48, 0.229   | 0.58, 0.449 | 3.08, 0.084      | 0.56, 0.458   | 0.20, 0.653     |
| RDS x region F, <i>p</i> -value               | 4.29, 0.043* | 2.96, 0.090   | 3.41, 0.069 | 11.39, 0.001**   | 0.66, 0.424   | 18.4, <0.001*** |
| RDS x LMH density F, <i>p</i> -value          | 0.05, 0.816  | 0.89, 0.348   | 0.49, 0.483 | 1.49, 0.227      | 2.68, 0.111   | 3.03, 0.085     |
| Region x LMH density F, <i>p</i> -value       | 1.42, 0.247  | 1.32, 0.256   | 2.43, 0.125 | 1.22, 0.273      | 0.75, 0.392   | 5.14, 0.024*    |
| RDS x region x LMH density F, <i>p</i> -value | 0.04, 0.841  | 0.08, 0.771   | 0.30, 0.584 | 3.32, 0.073      | 0.208, 0.651  | 1.91, 0.172     |
| Adj. R2                                       | 0.013        | 0.037         | 0.035       | 0.992            | -0.050        | 0.113           |
| Scale est.                                    | 0.002        | 0.002         | 0.002       | 0.001            | 0.014         | 0.015           |
| Residual deviance                             | 1.01         | 1.14          | 1.15        | 0.349            | 0.571         | 5.95            |

724

725

726



Figure 2

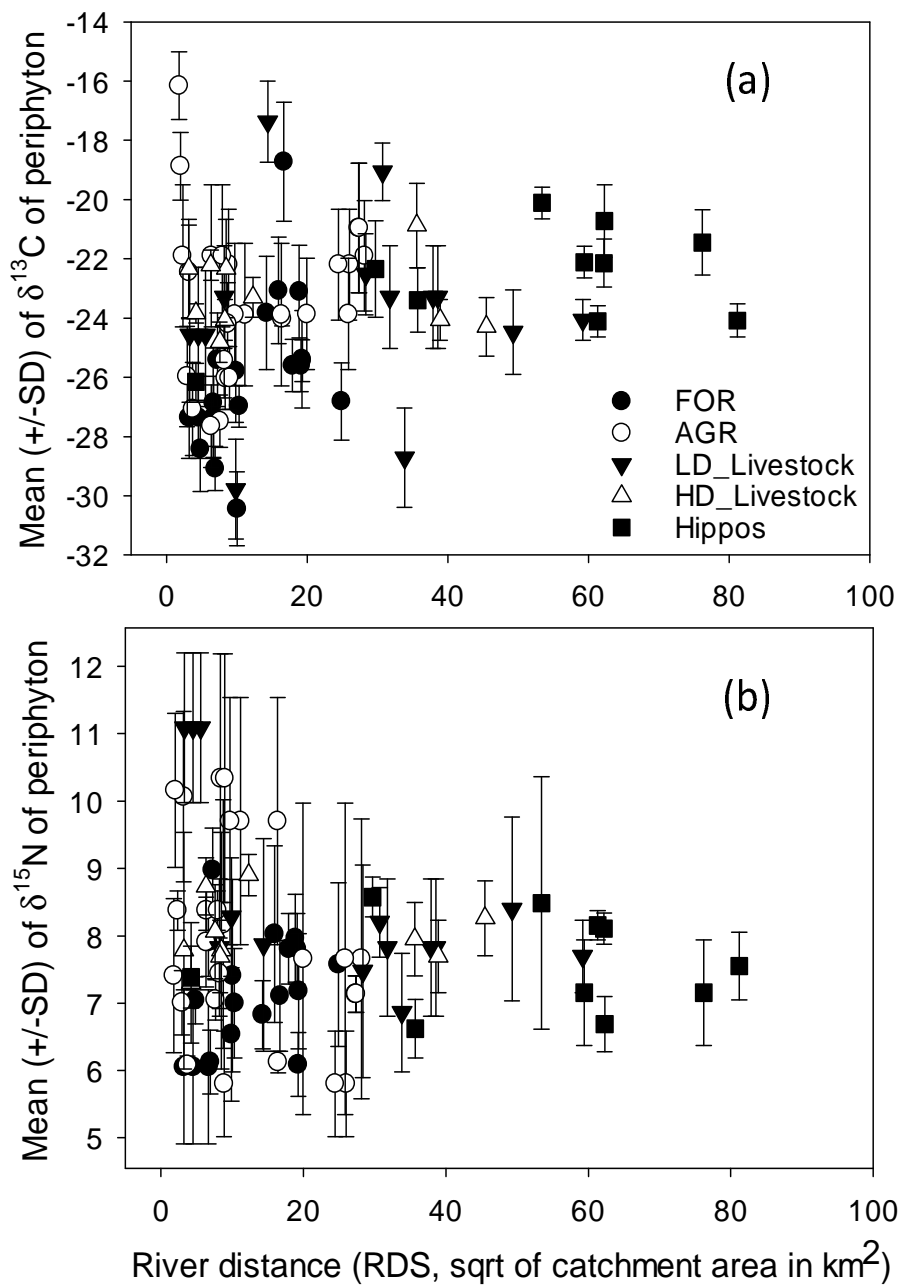

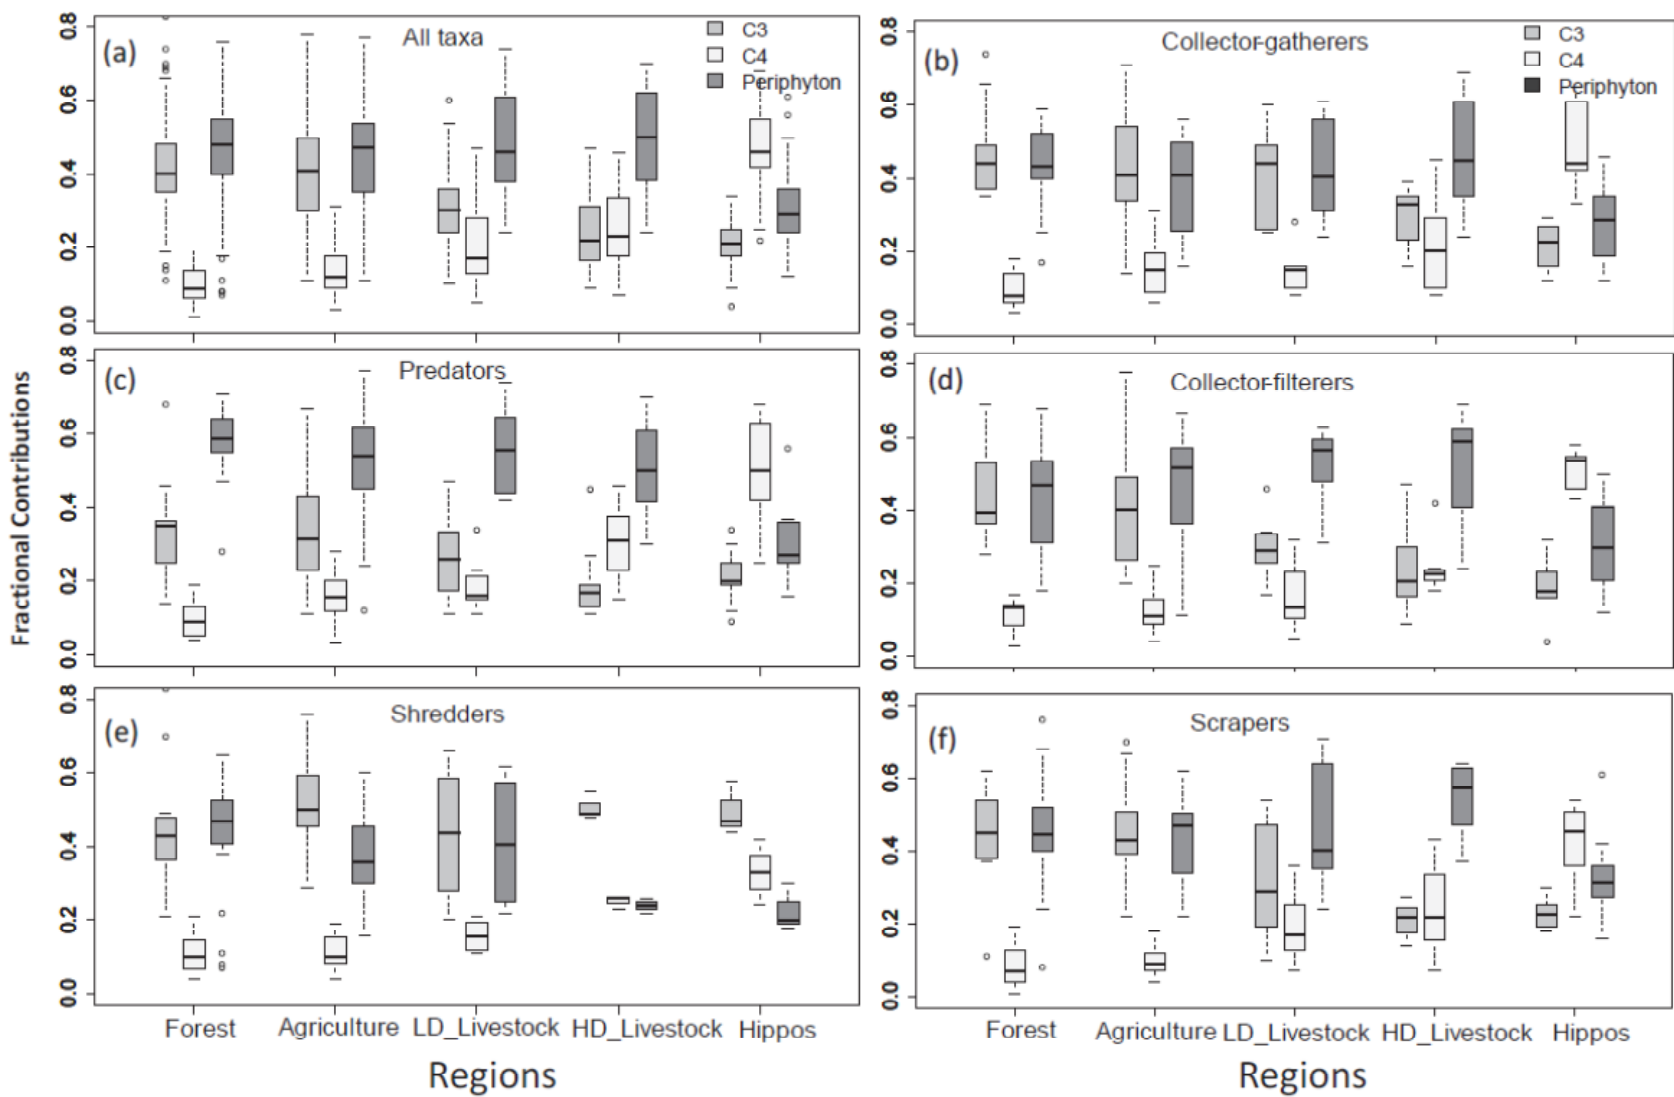



Figure 4

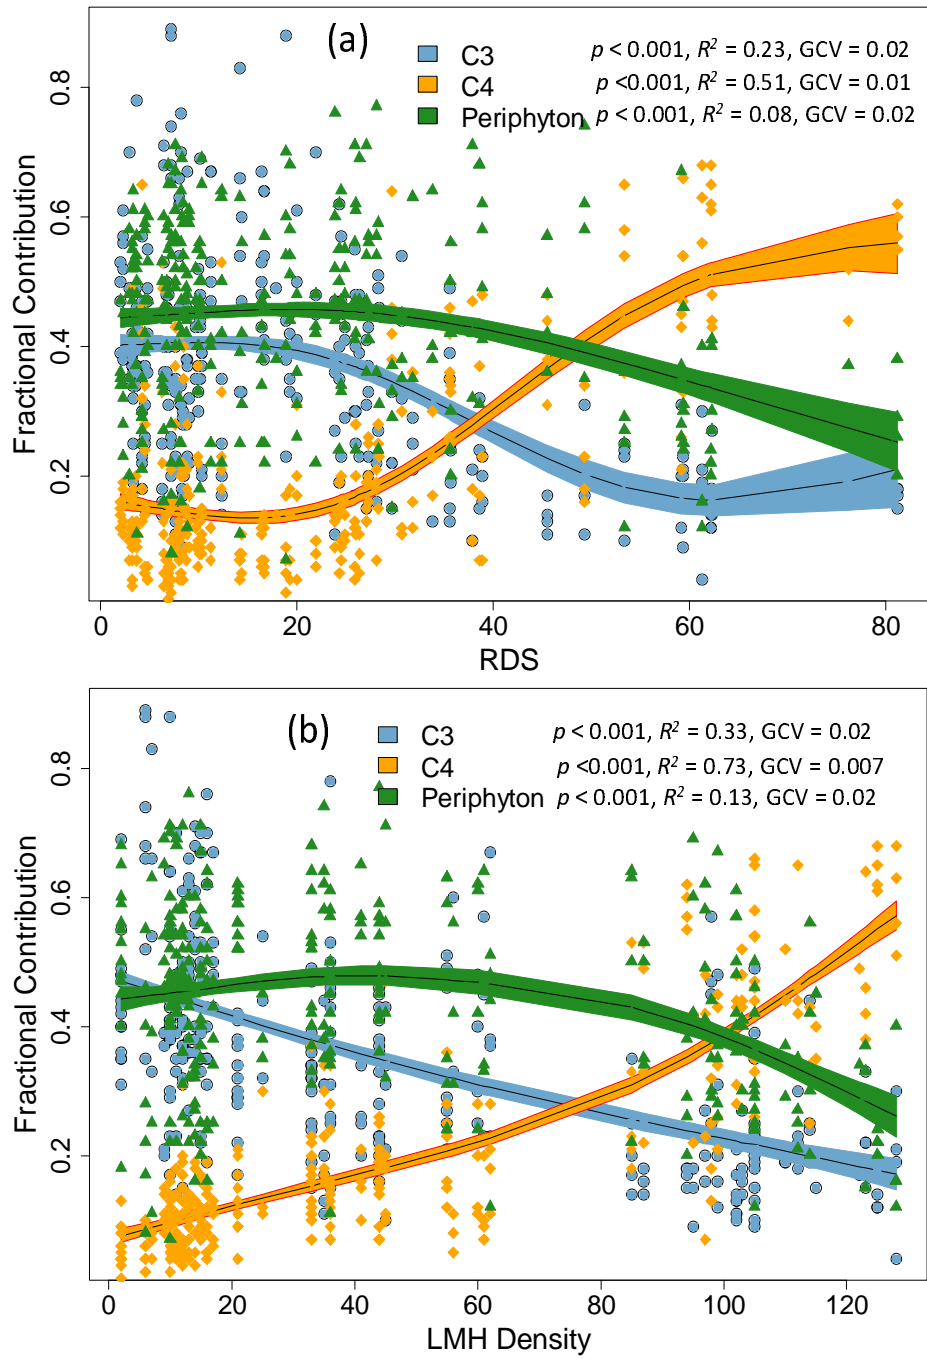

Figure 5

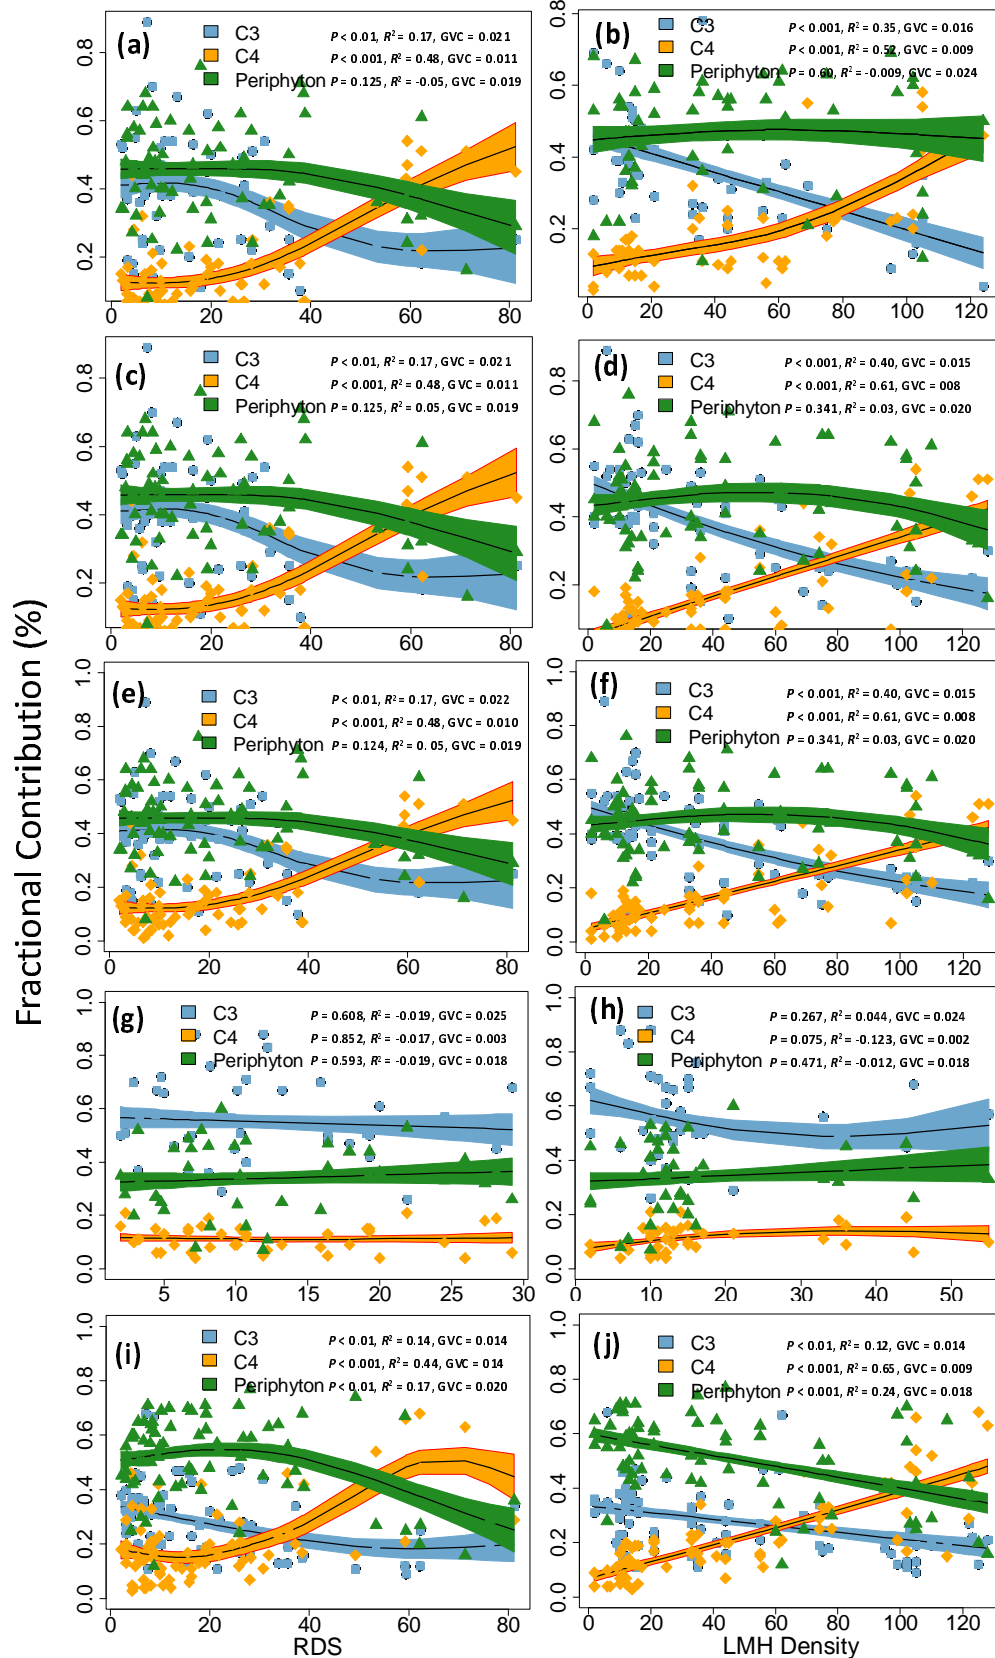

Source: http://biorxiv.org/content/10.1101/2021.07.29.454315v1.full.pdf
